# Supplementary material for: Simulation-Based Assessment of the Impact of Non-Adherence on Endoxifen Target Attainment in Different Tamoxifen Dosing Strategies
Source: PubMed Central journal article supplement (PMC7913149; doi:10.3390/ph14020115), 2021-02-03
Supplement: pharmaceuticals-14-00115-s001.pdf [file pharmaceuticals-14-00115-s001.pdf]

## **Supplementary material**

### **Simulation-based Assessment of the Impact of Non-adherence on Endoxifen Target Attainment in Different Tamoxifen Dosing Strategies**

Authors: Anna Mueller-Schoell, Lena Klopp-Schulze, Robin Michelet,  
Madelé van Dyk, Thomas E. Mürdter, Matthias Schwab, Markus Joerger,  
Wilhelm Huisinga, Gerd Mikus and Charlotte Kloft

**Table S1.** Comparison of  $C_{SS,min\ ENDX}$ , interindividual variability and proportion in fully adherent patients with subtarget concentrations in the five dosing strategies stratified in the three CYP2D6 genotype-predicted phenotypes with their individual doses.

| CYP2D6                         | (1) Standard dosing |           |           |           | (2) CYP2D6-guided dosing |           |           |           | (3) Model-informed precision dosing (5.97 ng/mL target) |           |           |           | (4) Model-informed precision dosing (5.97 ng/mL target) + 10 mg |           |           |           | (5) Model-informed precision dosing (9 ng/mL target) |           |           |           |
|--------------------------------|---------------------|-----------|-----------|-----------|--------------------------|-----------|-----------|-----------|---------------------------------------------------------|-----------|-----------|-----------|-----------------------------------------------------------------|-----------|-----------|-----------|------------------------------------------------------|-----------|-----------|-----------|
|                                | gNM                 | gIM       | gPM       | all       | gNM                      | gIM       | gPM       | all       | gNM                                                     | gIM       | gPM       | all       | gNM                                                             | gIM       | gPM       | all       | gNM                                                  | gIM       | gPM       | all       |
| <i>n</i> <sub>patients</sub>   | 3396                | 2269      | 333       | 5998      | 3396                     | 2269      | 333       | 5998      | 3396                                                    | 2269      | 333       | 5998      | 3396                                                            | 2269      | 333       | 5998      | 3396                                                 | 2269      | 333       | 5998      |
| <b>Dose (mg)</b>               | 20                  | 20        | 20        | 20        | 20                       | 30        | 60        | 20-60     | 5-120                                                   | 5-120     | 5-120     | 5-120     | 15-130                                                          | 15-130    | 15-130    | 15-130    | 5-120                                                | 5-120     | 5-120     | 5-120     |
| <i>C</i> <sub>SS,minENDX</sub> |                     |           |           |           |                          |           |           |           |                                                         |           |           |           |                                                                 |           |           |           |                                                      |           |           |           |
| <b>-Median</b>                 | 13.1                | 8.52      | 3.81      | 10.7      | 13.1                     | 12.8      | 11.4      | 12.9      | 8.52                                                    | 8.39      | 7.74      | 8.41      | 15.3                                                            | 13.0      | 9.71      | 14.1      | 12.7                                                 | 12.3      | 10.6      | 12.4      |
| <b>-IQR</b>                    | 9.06-19.1           | 5.48-12.8 | 2.36-5.36 | 6.80-16.2 | 9.06-19.1                | 8.22-19.2 | 7.07-16.1 | 8.65-19.0 | 7.05-10.2                                               | 7.06-9.98 | 6.80-9.29 | 7.03-10.1 | 12.8-19.0                                                       | 10.8-15.8 | 8.33-11.9 | 11.5-17.6 | 10.6-15.0                                            | 10.4-14.8 | 9.48-12.4 | 10.4-14.8 |
| <b>-CV, %</b>                  | 54.0                | 60.5      | 57.2      | 62.5      | 54.0                     | 60.5      | 57.2      | 56.8      | 24.2                                                    | 24.2      | 22.6      | 24.2      | 30.1                                                            | 29.4      | 25.8      | 32.0      | 23.7                                                 | 24.0      | 22.7      | 24.1      |
| <i>n</i> <sub>risk, %</sub>    | 7.69                | 28.9      | 81.7      | 19.8      | 7.60                     | 10.5      | 16.5      | 9.19      | 7.60                                                    | 10.5      | 16.5      | 9.19      | 0.0294                                                          | 0.220     | 2.40      | 0.233     | 0.00                                                 | 0.132     | 1.50      | 0.133     |

*Abbreviations:*  $C_{SS,min\ ENDX}$ : minimum endoxifen concentrations at steady-state [ng/mL]; CV: coefficient of variation; IQR: inter-quartile range; gXM: genotype predicted metaboliser; NM: normal metaboliser; IM: intermediate metabolisers, PM: poor metabolisers; *n*<sub>risk, %</sub>: proportion of patients at risk for  $C_{SS,min\ ENDX}$  below the proposed therapeutic threshold of 5.97 ng/mL [1]

**Figure S1.** Range and proportions of the individual dose selection in MIPD targeting the proposed therapeutic target threshold of 5.97 ng/mL [1].

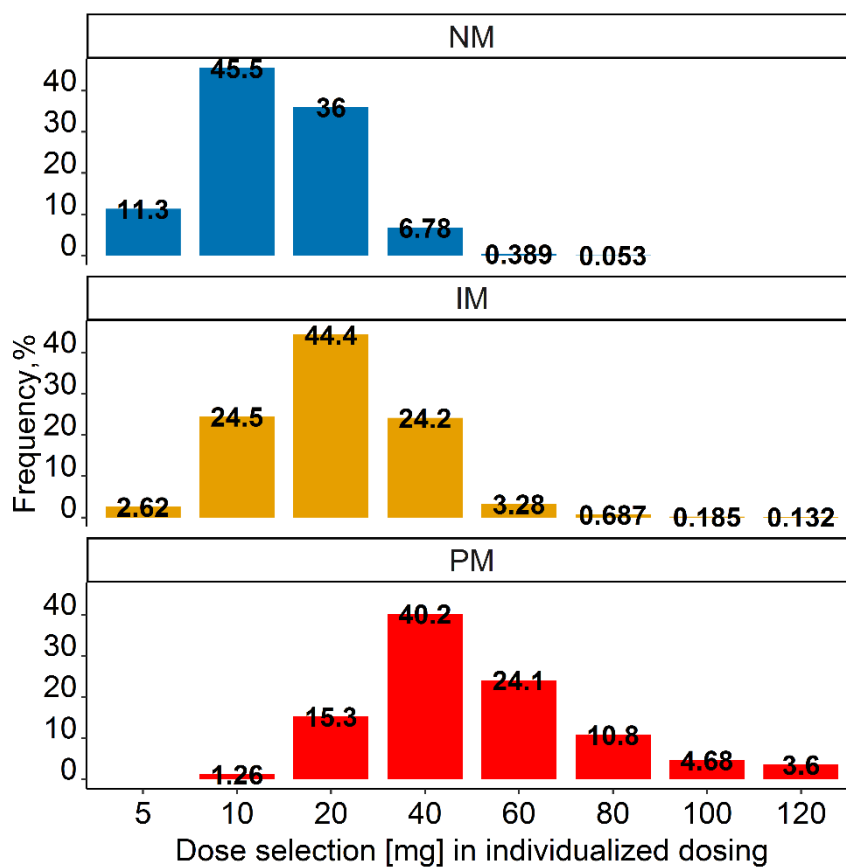

*Abbreviations:* gXM: genotype predicted metaboliser; NM: normal metaboliser; IM: intermediate metabolisers, PM: poor metabolisers.

**Figure S2.** Range and proportions of the individual dose selection in MIPD targeting the lowest reported mean  $C_{SS,min}^{ENDX}$  in gNM of 9 ng/mL [2].

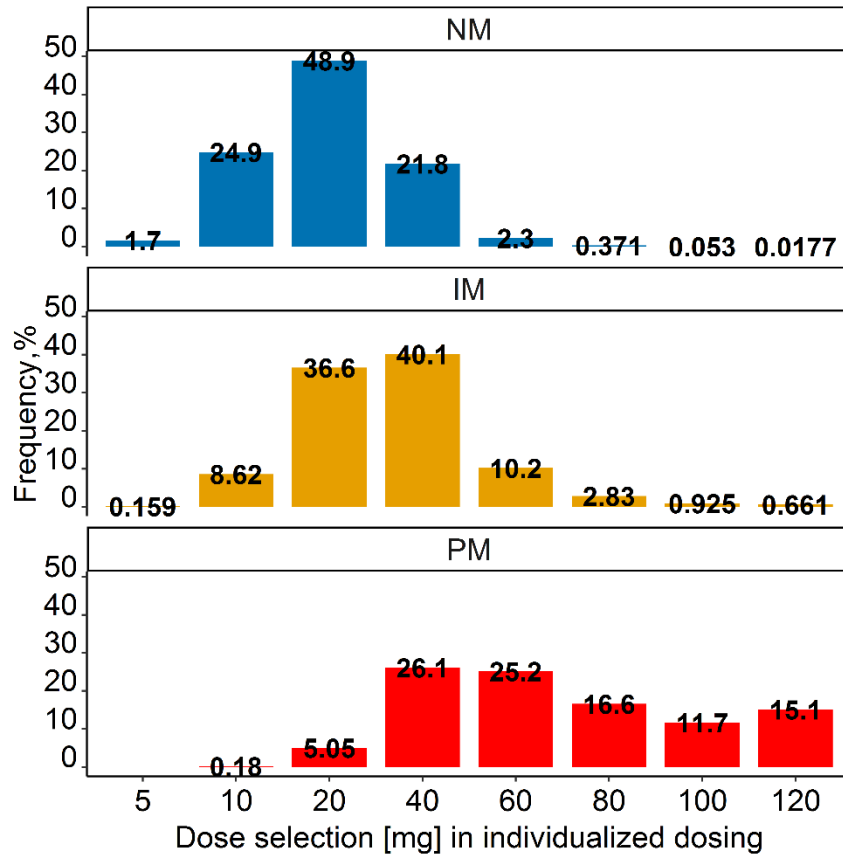

*Abbreviations:* gXM: genotype predicted metaboliser; NM: normal metaboliser; IM: intermediate metabolisers, PM: poor metabolisers.

**Supplementary Figure 3.** Range and proportions of the individual dose selection in MIPD targeting the proposed therapeutic target threshold of 5.97 ng/mL [1] and adding 10 mg to each selected dose.

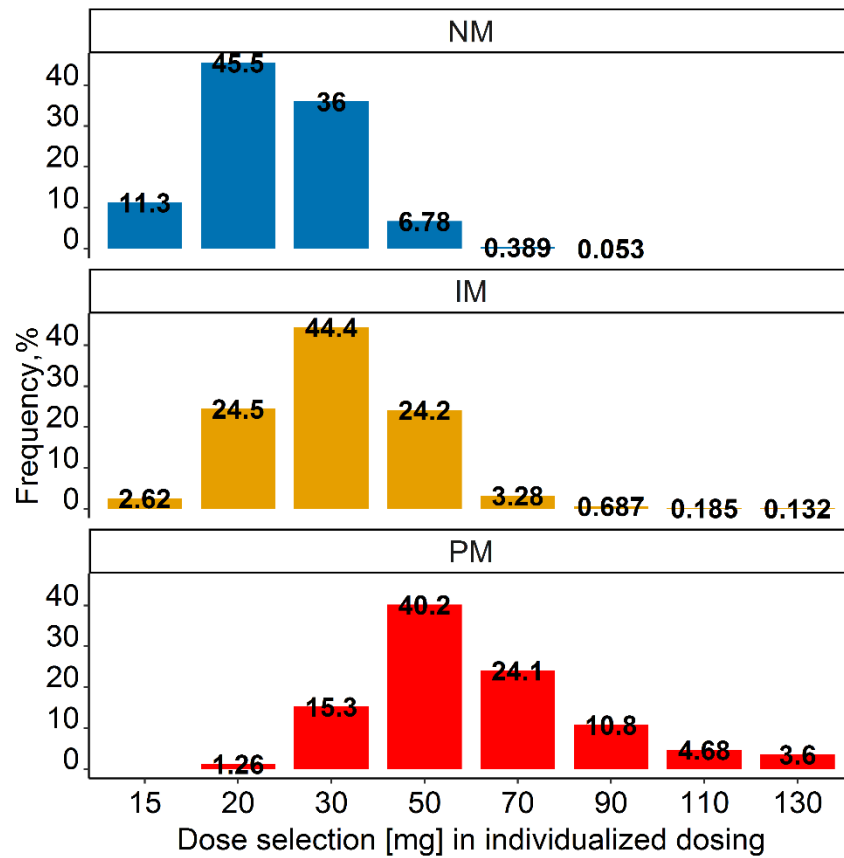

*Abbreviations:* gXM: genotype predicted metaboliser; NM: normal metaboliser; IM: intermediate metabolisers, PM: poor metabolisers.

## References

1. Madlensky, L.; Natarajan, L.; Tchu, S.; Pu, M.; Mortimer, J.; Flatt, S.W.; Nikoloff, D.M.; Hillman, G.; Fontecha, M.R.; Lawrence, H.J.; et al. Tamoxifen metabolite concentrations, CYP2D6 genotype, and breast cancer outcomes. *Clin. Pharmacol. Ther.* **2011**, *89*, 718–725, doi:10.1038/clpt.2011.32.
2. Hertz, D.L.; Deal, A.; Ibrahim, J.G.; Walko, C.M.; Weck, K.E.; Anderson, S.; Magrinat, G.; Olajide, O.; Moore, S.; Raab, R.; et al. Tamoxifen Dose Escalation in Patients With Diminished CYP2D6 Activity Normalizes Endoxifen Concentrations Without Increasing Toxicity. *Oncologist* **2016**, *21*, 795–803.
